# Supplementary material for: Trace elements in PM2.5 shed light on Saharan dust incursions over the Munich airshed in spring 2022
Source: Royal Society of Chemistry journal article supplement (doi:10.1039/d4ea00092g), 2024-01-01

**MULTI-MODEL Dust Optical Depth (550nm)**  
Valid: 00h 14 Mar 2022 (H+12)

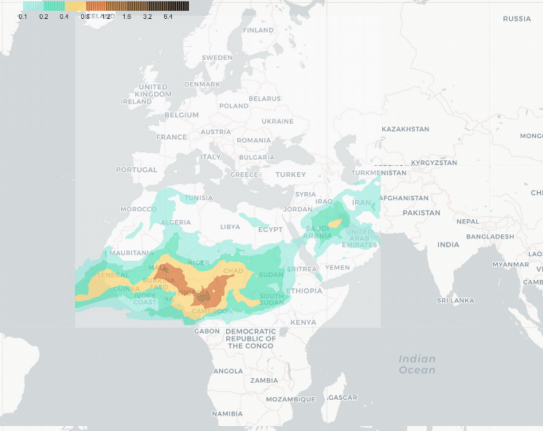

**MULTI-MODEL Dust Optical Depth (550nm)**  
Valid: 00h 15 Mar 2022 (H+12)

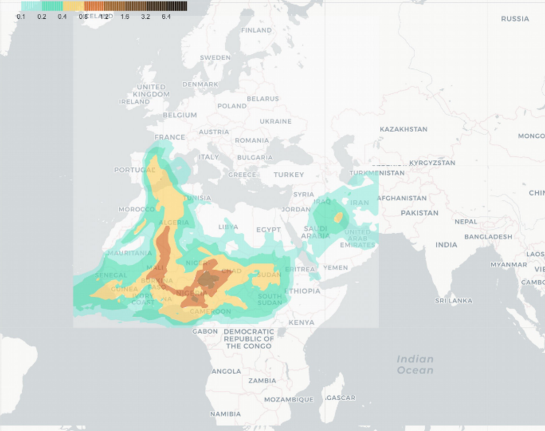

**MULTI-MODEL Dust Optical Depth (550nm)**  
Valid: 00h 16 Mar 2022 (H+12)

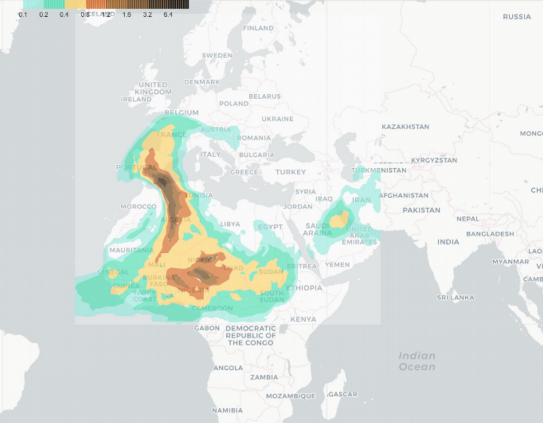

**MULTI-MODEL Dust Optical Depth (550nm)**  
Valid: 00h 17 Mar 2022 (H+12)

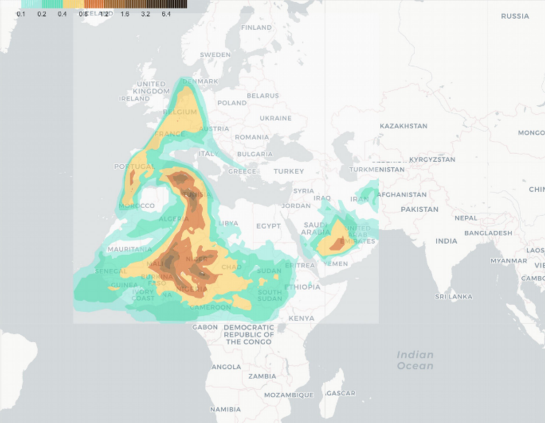

**MULTI-MODEL Dust Optical Depth (550nm)**  
Valid: 00h 18 Mar 2022 (H+12)

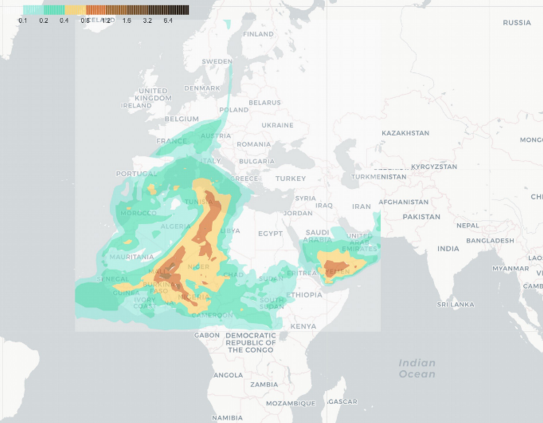

**MULTI-MODEL Dust Optical Depth (550nm)**  
Valid: 00h 19 Mar 2022 (H+12)

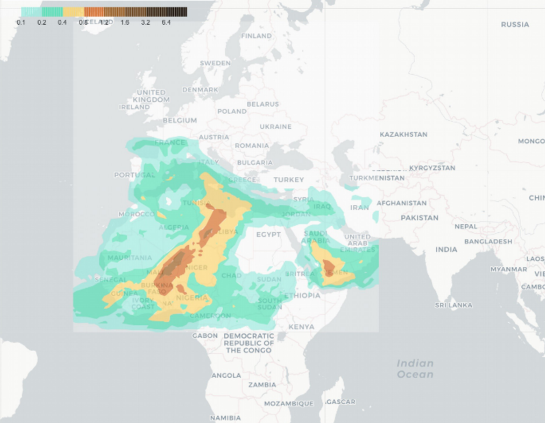

Supplement: d4ea00092g2.pdf [file d4ea00092g2.pdf]
