# Supplementary material for: Trace elements in PM2.5 shed light on Saharan dust incursions over the Munich airshed in spring 2022
Source: Royal Society of Chemistry journal article supplement (doi:10.1039/d4ea00092g), 2024-01-01
Supplement: d4ea00092g9.pdf [file d4ea00092g9.pdf]

## Trace elements in PM<sub>2.5</sub> shed light over Saharan dust incursions over Munich airshed in spring 2022

S. Padoan<sup>1</sup>, A. Zappi<sup>2</sup>, Jan Bendl<sup>1</sup>, T. Herrmann<sup>1</sup>, A. P. Mudan<sup>1</sup>, Carsten Neukirchen<sup>1</sup>, Erika Brattich<sup>3</sup>, Laura Tositti<sup>2</sup>, T. Adam<sup>1</sup>

<sup>1</sup> University of the Bundeswehr Munich, Faculty for Mechanical Engineering, Institute of Chemical and Environmental Engineering, Werner-Heisenberg-Weg 39, 85577, Neubiberg, Germany

<sup>2</sup>University of Bologna, Department of Chemistry “G. Ciamician”, Bologna, Italy

<sup>3</sup>University of Bologna, Department of Physics and Astronomy “Augusto Righi”, Bologna, Italy

Corresponding author: Sara Padoan (sara.padoan@unibw.de)

### Supplementary material

**Table S1.** Signal-to-noise ratio (SNR), background equivalent concentrations (BEC), limits of detection (LoD) and limits of quantification (LoQ) for all the elements. All data are in  $\mu\text{g L}^{-1}$ .

| Element | SNR    | BEC     | LOD   | LOQ   |
|---------|--------|---------|-------|-------|
| Na      | 1      | 77.6    | 79    | 82    |
| Mg      | 0.7    | 1.18    | 2     | 3     |
| Al      | 0.6    | 2.16    | 3     | 4     |
| Ca      | 5      | 21.2    | 26    | 38    |
| S       | 0.3    | 3.35    | 4     | 4     |
| K       | 4      | 29.6    | 34    | 44    |
| Cr      | 0.013  | 0.0920  | 0.10  | 0.13  |
| Mn      | 0.03   | 0.0339  | 0.06  | 0.13  |
| Fe      | 0.07   | 1.25    | 1.3   | 1.5   |
| Co      | 0.0010 | 0.00481 | 0.006 | 0.008 |
| Ni      | 0.03   | 0.108   | 0.14  | 0.2   |
| Cu      | 0.011  | 0.119   | 0.13  | 0.2   |
| Zn      | 0.2    | 3.19    | 3     | 4     |
| V       | 0.002  | 0.00213 | 0.004 | 0.009 |
| As      | 0.005  | 0.0121  | 0.02  | 0.03  |
| Sr      | 0.017  | 0.119   | 0.14  | 0.2   |
| Se      | 0.02   | 0.00838 | 0.03  | 0.09  |
| Mo      | 0.006  | 0.0150  | 0.02  | 0.03  |
| Cd      | 0.002  | 0.00319 | 0.006 | 0.011 |
| Sb      | 0.002  | 0.00497 | 0.007 | 0.011 |
| Ba      | 0.007  | 0.192   | 0.2   | 0.2   |
| Pb      | 0.015  | 0.0919  | 0.11  | 0.14  |

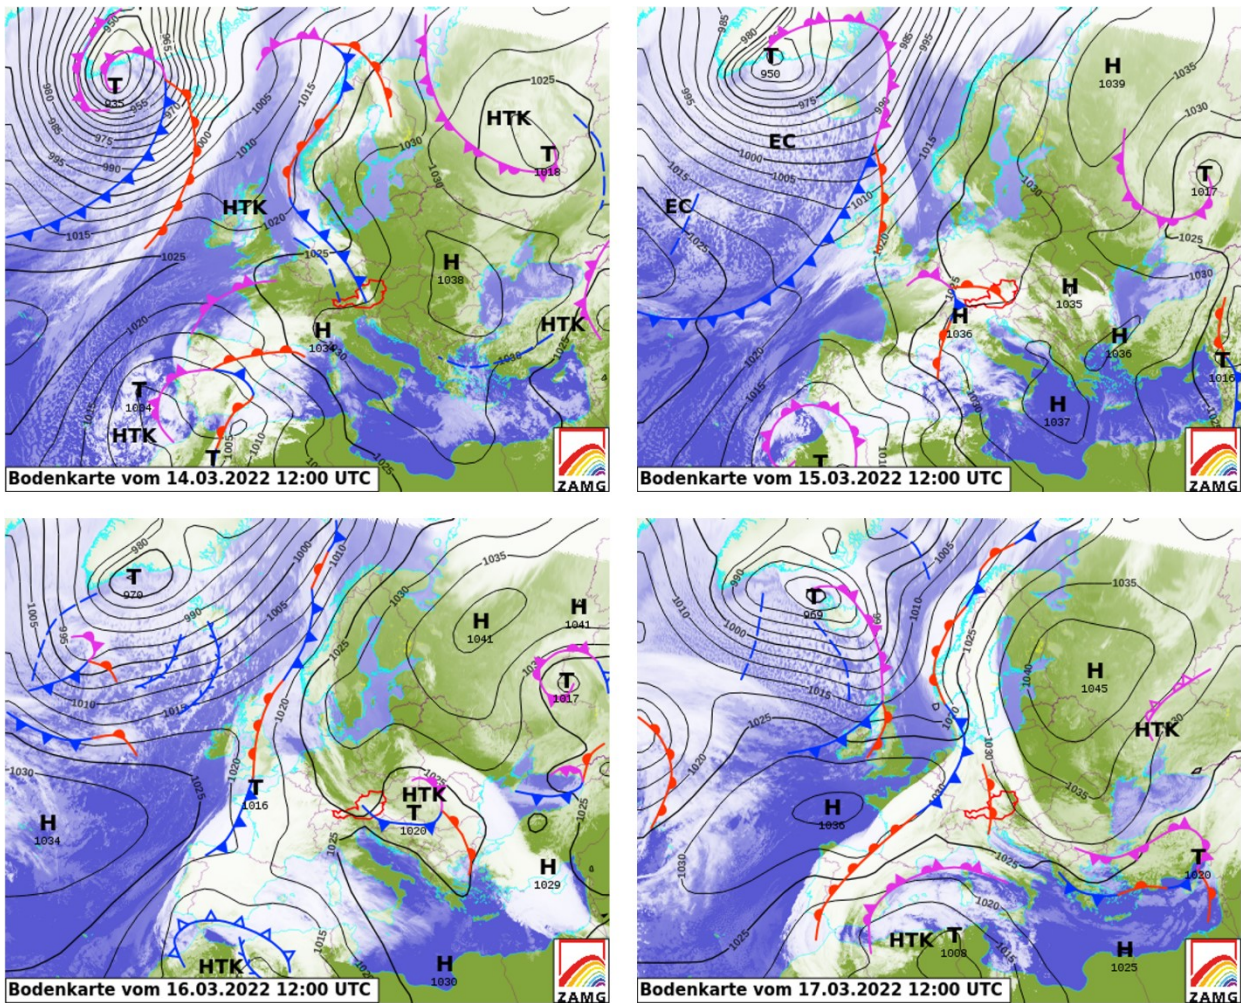

**Figure S1.** Synoptic situation for the period of 14-17 March 2022 (from top-left to bottom-right). 'H' and 'T' indicate, respectively, the centers of high and low pressure systems). Source: Zentralanstalt für Meteorologie und Geodynamik (ZAMG), Austria.

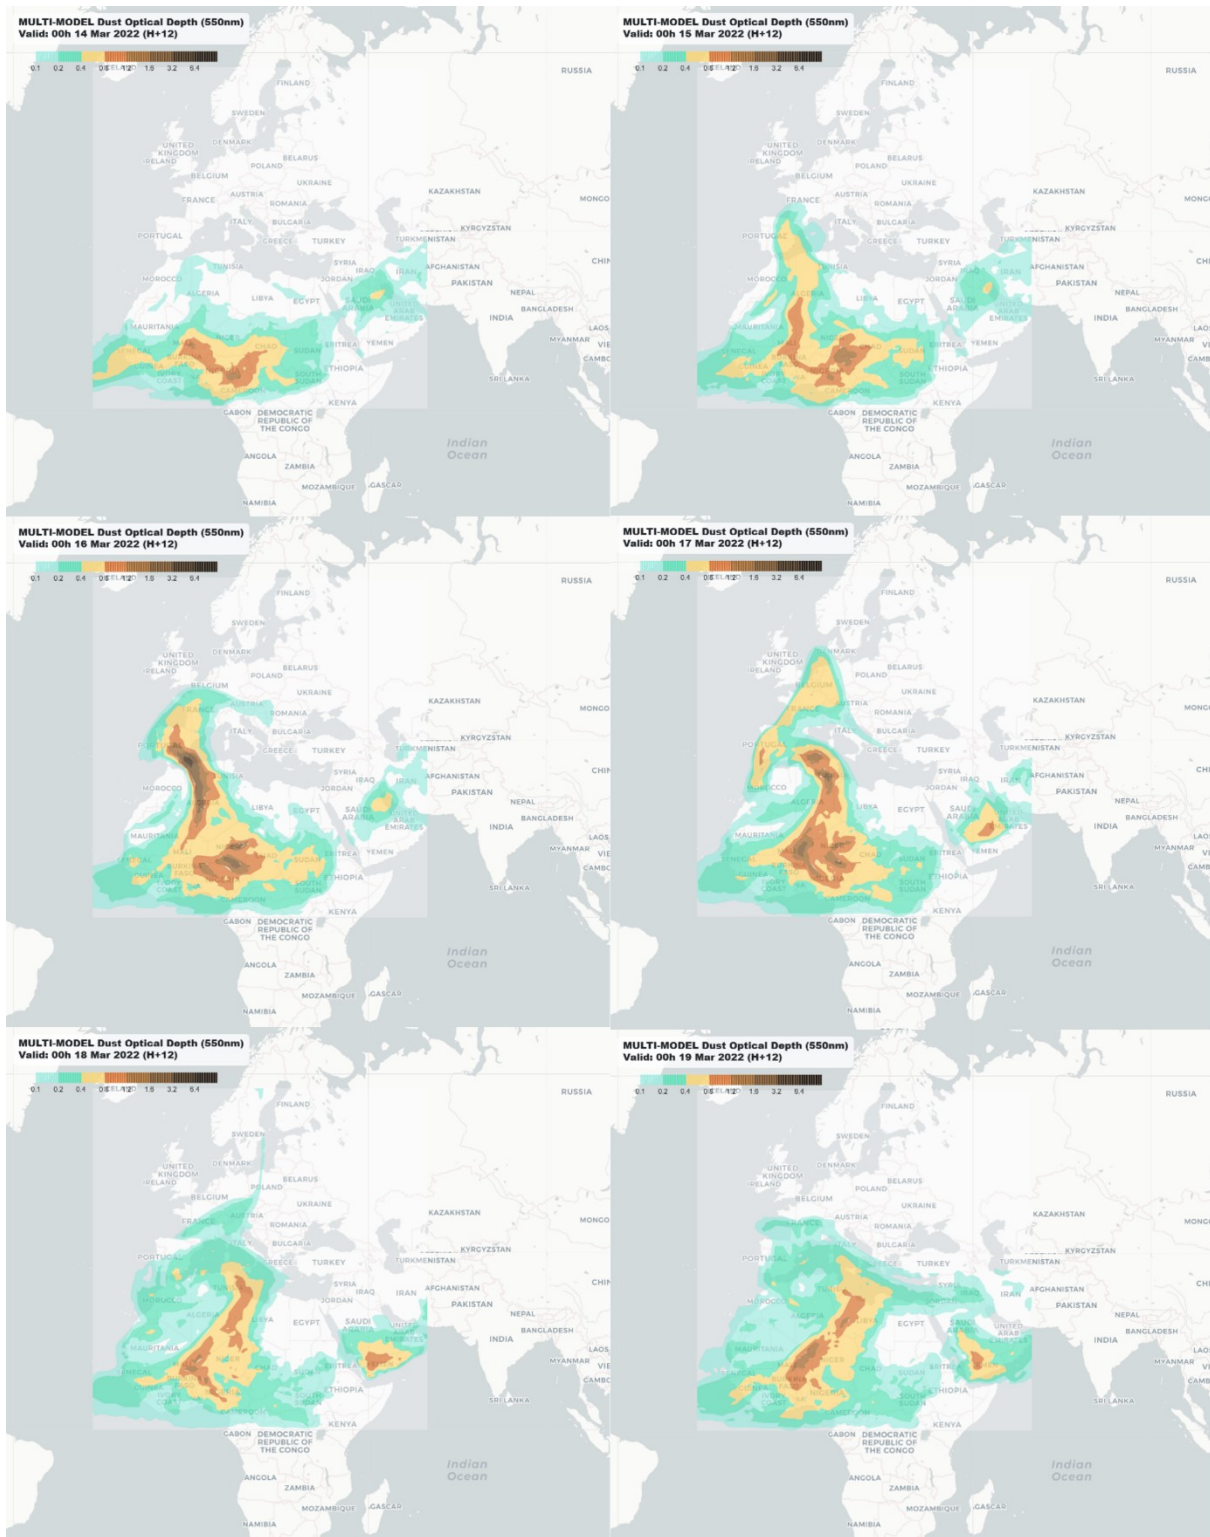

**Figure S2.** Multimodel forecast of dust optical depth at 550 nm, for the period 14-19 March 2022 (from top-left to bottom-right), 12 UTC. Source: SDS-WAS from AEMET and the Barcelona Dust Center.



March 15<sup>th</sup>

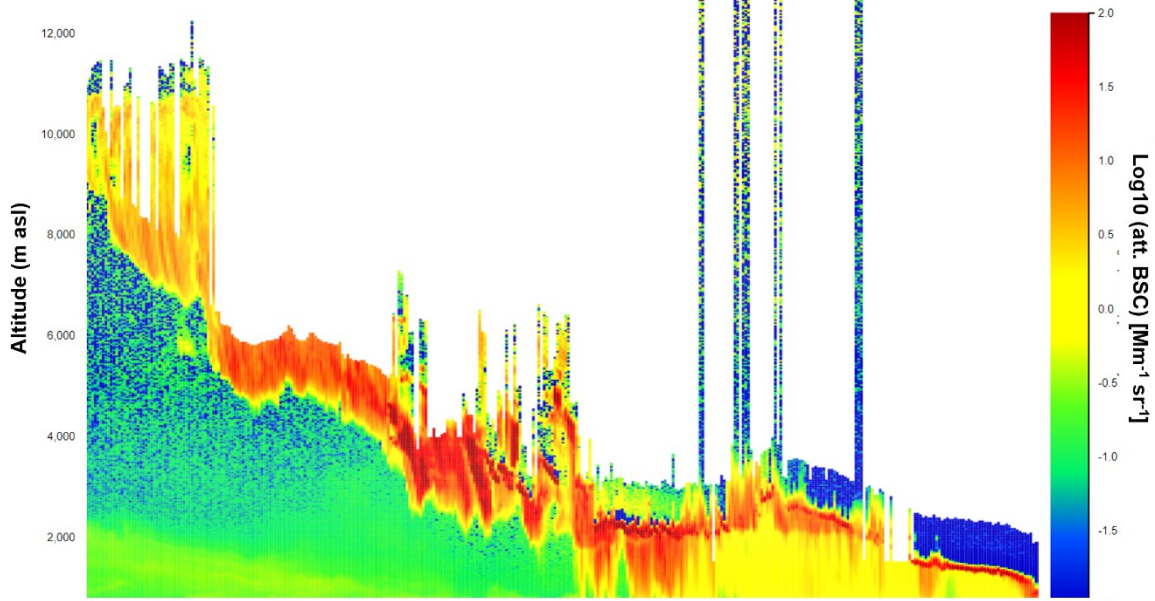

March 16<sup>th</sup>

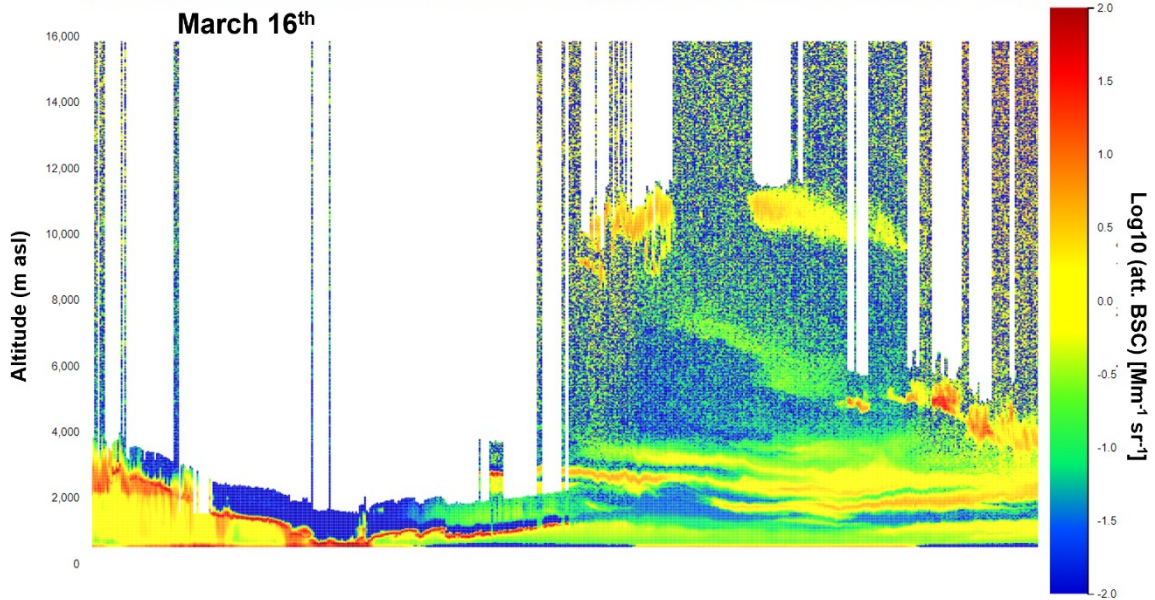

March 17<sup>th</sup>

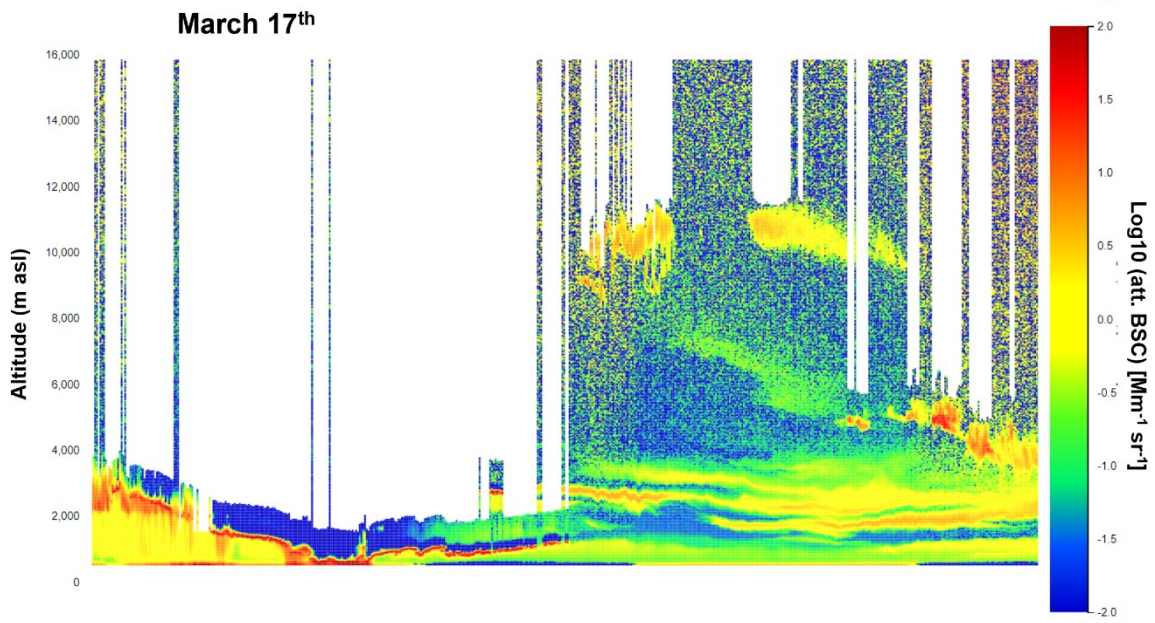



**Figure S3.** Time-series of the vertical profiles of attenuated backscatter coefficient measured at a ceilometer network, coordinated by E-PROFILE of the EUMETNET Composite Observing System, EUCOS (<https://e-profile.eu/>) at Oberschleissheim nearby Munich for 15-16-17March 2022.

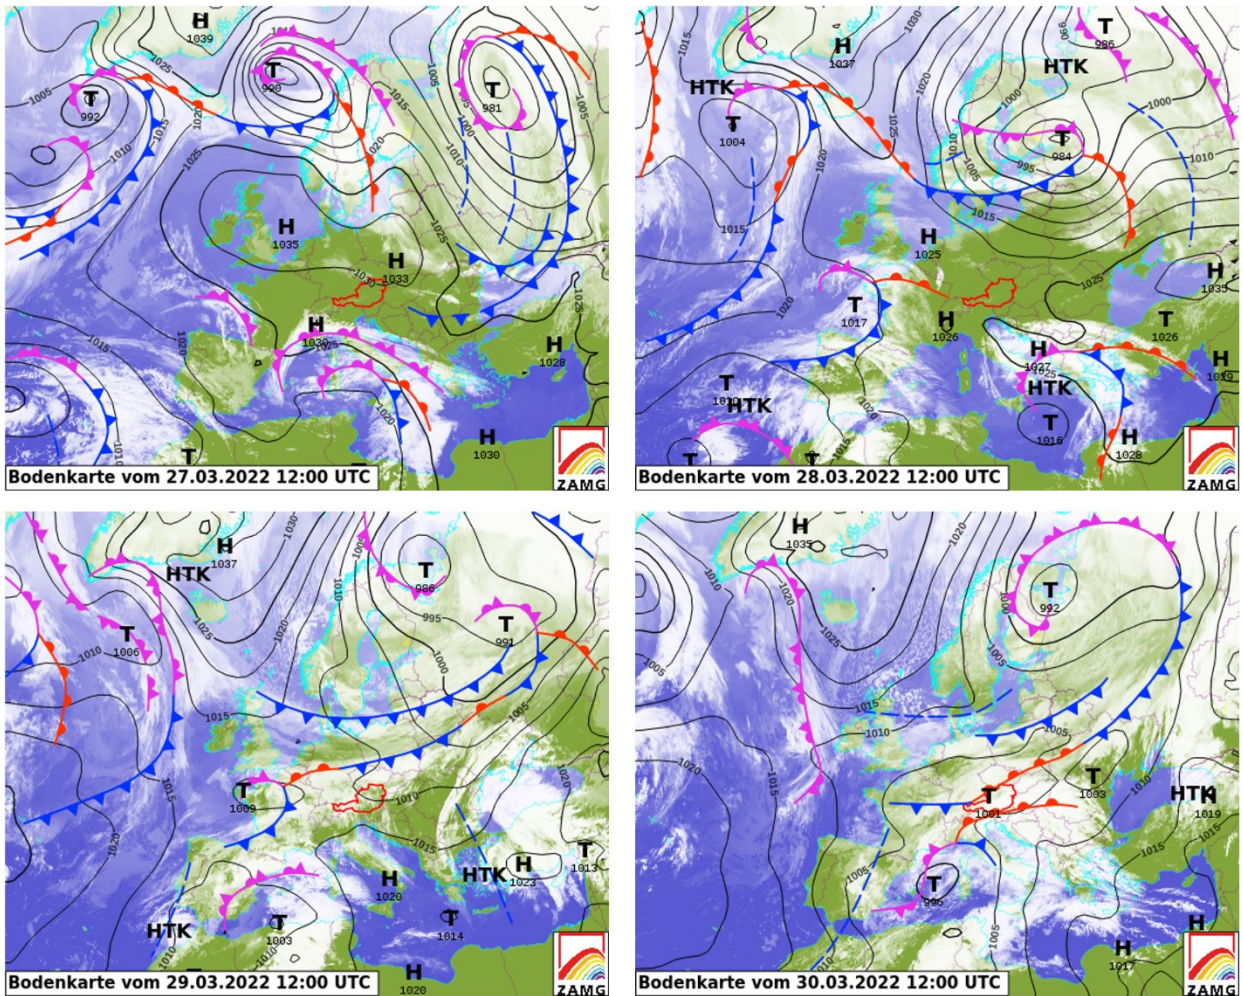

**Figure S4.** Synoptic situation for the period of 27-30 March 2022 (from top-left to bottom-right). 'H' and 'T' indicate, respectively, the centers of high and low pressure systems. Source: Zentralanstalt für Meteorologie und Geodynamik (ZAMG), Austria.

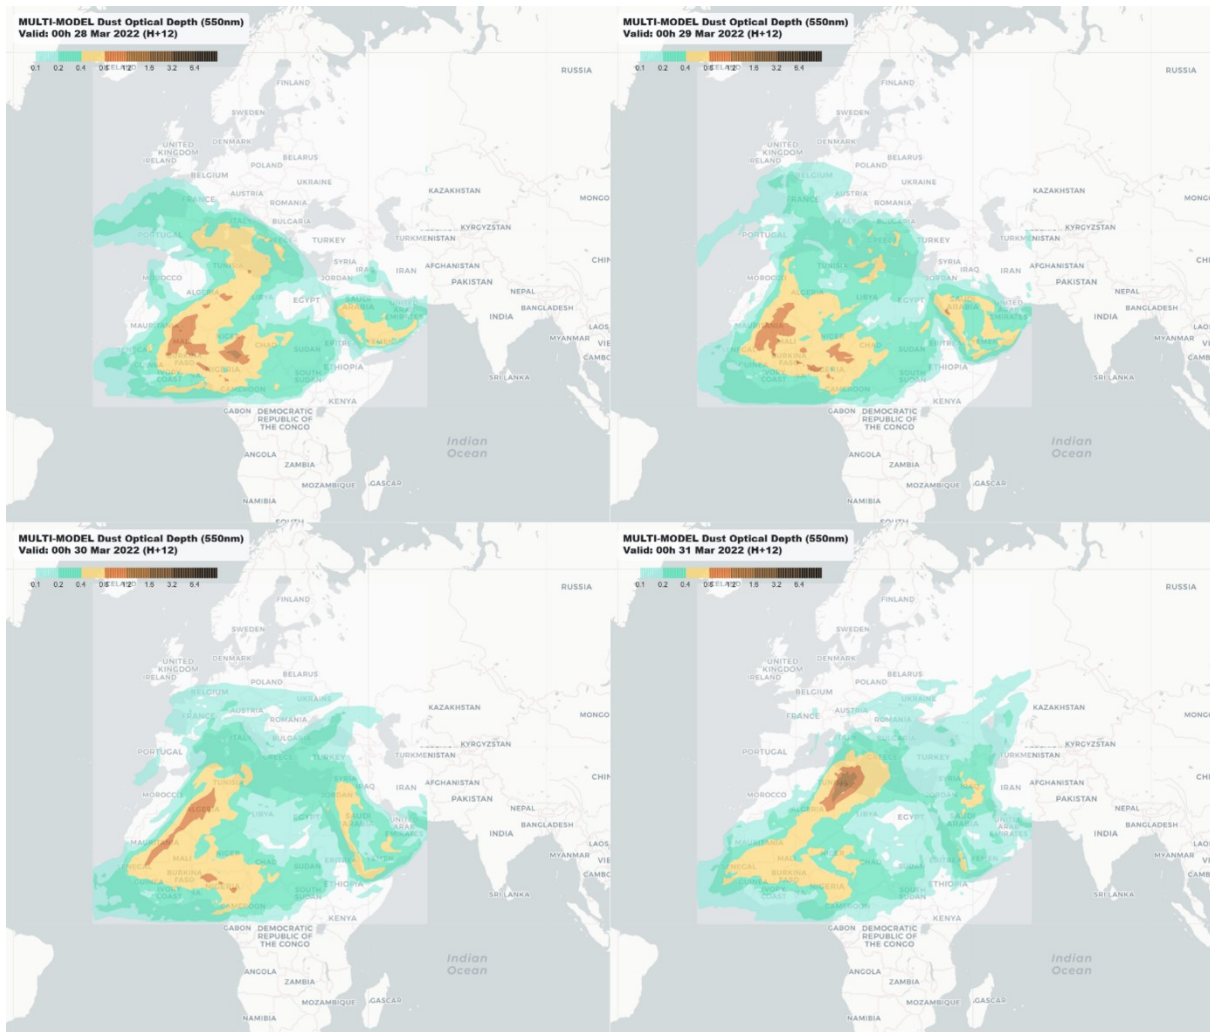

**Figure S5.** Multimodel forecast of dust optical depth at 550 nm, for the period 28-31 March 2022 (from top-left to bottom-right), 12 UTC. Source: SDS-WAS from AEMET and the Barcelona Dust Center.



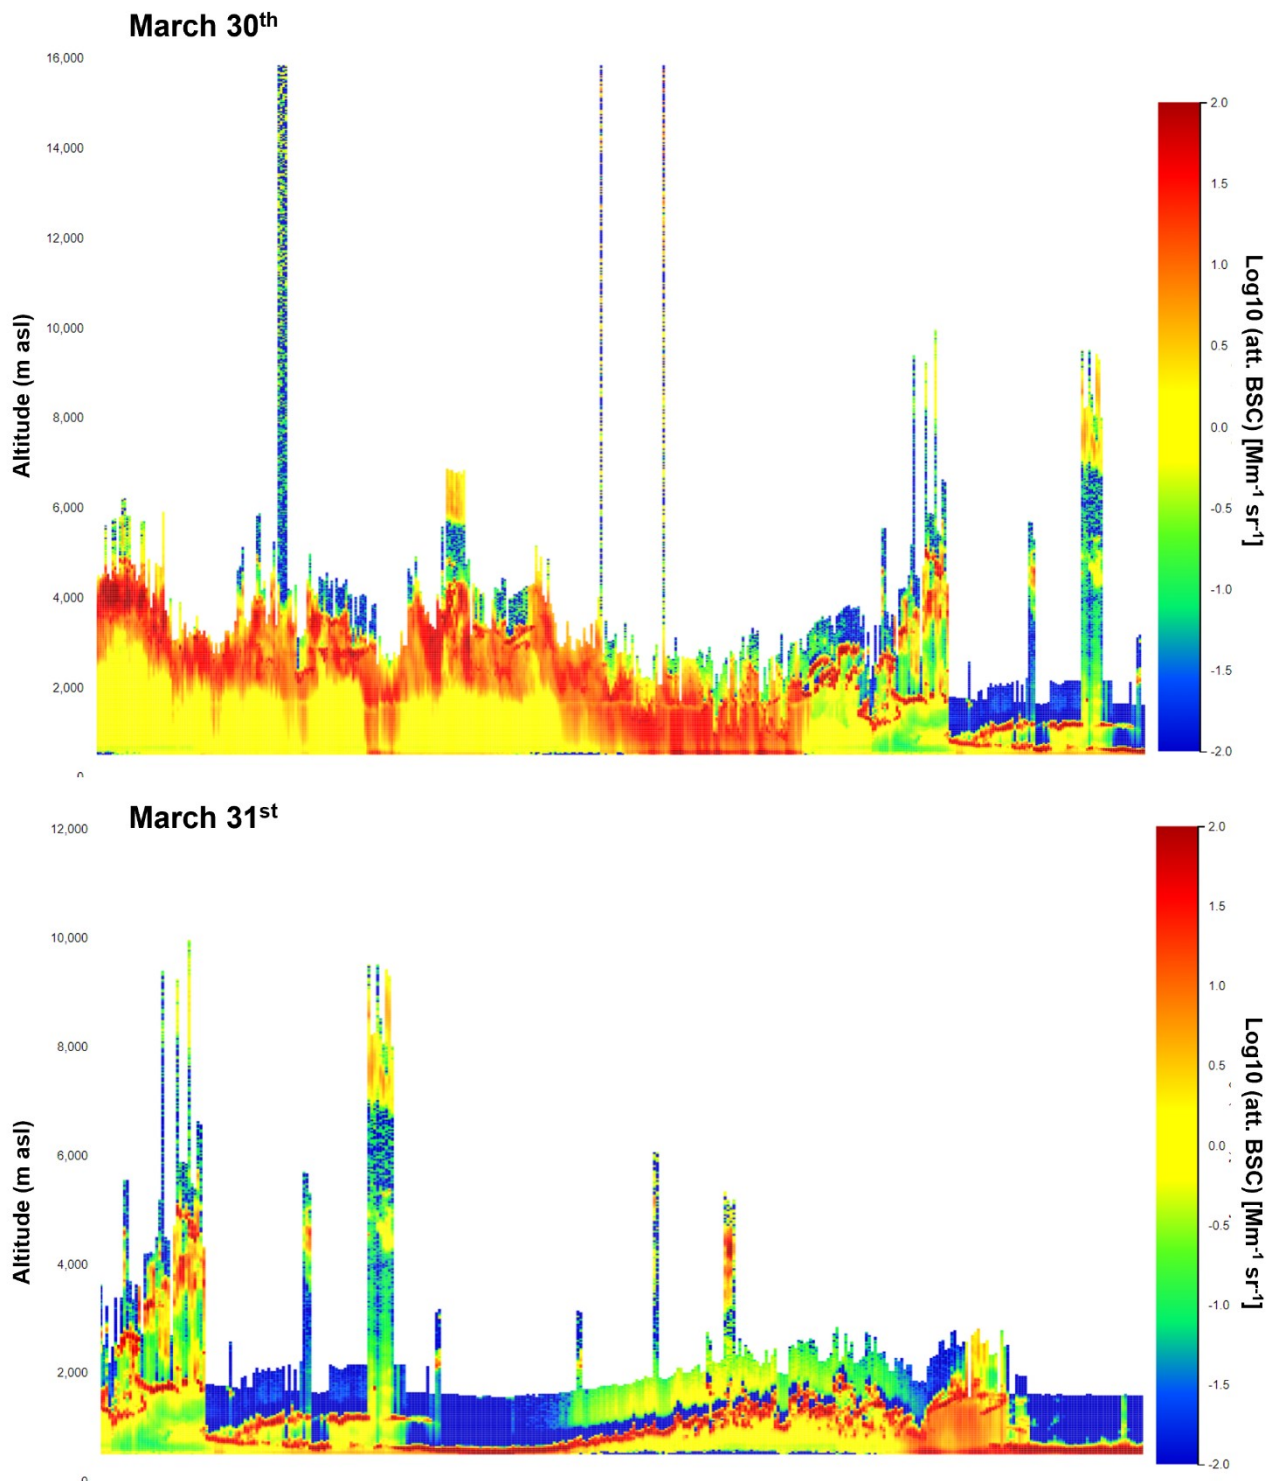

**Figure S6.** Time-series of the vertical profiles of attenuated backscatter coefficient measured at a ceilometer network, coordinated by E-PROFILE of the EUMETNET Composite Observing System, EUCOS (<https://e-profile.eu/>) at Oberschleissheim nearby Munich for 30-31 March 2022.

**Table S2.** Varimax loadings for metal concentrations in the reduced-dataset case, without SD-affected days. Bold values correspond to the most representative variables for each factor, EV stands for the explained variance.

|        | <b>Factor 1</b> | <b>Factor 2</b> | <b>Factor 3</b> | <b>Factor 4</b> | <b>Factor 5</b> | <b>Factor 6</b> |
|--------|-----------------|-----------------|-----------------|-----------------|-----------------|-----------------|
| EV (%) | 19.8            | 18.89           | 14.71           | 9.65            | 8.81            | 5.1             |
| Na     | -0.24           | -0.24           | -0.15           | 0.18            | 0.05            | -0.20           |
| Mg     | -0.06           | <b>-0.41</b>    | -0.07           | -0.09           | 0.08            | -0.10           |
| Al     | 0.03            | -0.25           | 0.05            | -0.28           | -0.13           | -0.35           |
| Ca     | 0.07            | <b>-0.46</b>    | 0.12            | -0.19           | -0.07           | 0.11            |
| S      | <b>0.45</b>     | 0.12            | 0.05            | -0.18           | 0.06            | -0.01           |
| K      | 0.16            | 0.05            | 0.08            | <b>0.44</b>     | -0.09           | -0.01           |
| Cr     | -0.03           | 0.02            | <b>-0.55</b>    | -0.11           | -0.03           | 0.15            |
| Mn     | -0.01           | 0.14            | <b>-0.52</b>    | -0.03           | -0.06           | 0.14            |
| Fe     | 0.14            | -0.23           | -0.26           | 0.07            | -0.06           | -0.09           |
| Co     | 0.00            | -0.06           | -0.10           | -0.02           | 0.23            | <b>0.73</b>     |
| Ni     | 0.08            | -0.21           | 0.07            | <b>-0.51</b>    | -0.05           | 0.18            |
| Cu     | 0.11            | -0.15           | <b>-0.28</b>    | 0.04            | -0.08           | -0.22           |
| Zn     | -0.12           | -0.01           | 0.00            | 0.05            | <b>-0.61</b>    | 0.08            |
| V      | 0.04            | 0.01            | -0.02           | 0.02            | <b>-0.62</b>    | 0.18            |
| As     | <b>0.32</b>     | 0.02            | 0.12            | 0.07            | -0.33           | 0.08            |
| Sr     | 0.03            | <b>-0.45</b>    | 0.15            | 0.08            | 0.04            | 0.22            |
| Se     | <b>0.45</b>     | 0.08            | 0.03            | 0.03            | 0.13            | -0.07           |
| Mo     | 0.00            | -0.12           | <b>-0.34</b>    | 0.12            | 0.03            | -0.05           |
| Cd     | <b>0.38</b>     | -0.09           | -0.08           | 0.10            | -0.02           | 0.09            |
| Sb     | 0.20            | -0.22           | -0.16           | 0.16            | 0.01            | -0.12           |
| Ba     | -0.02           | -0.25           | 0.14            | <b>0.53</b>     | 0.06            | 0.16            |
| Pb     | <b>0.40</b>     | 0.01            | -0.09           | 0.02            | 0.08            | -0.04           |



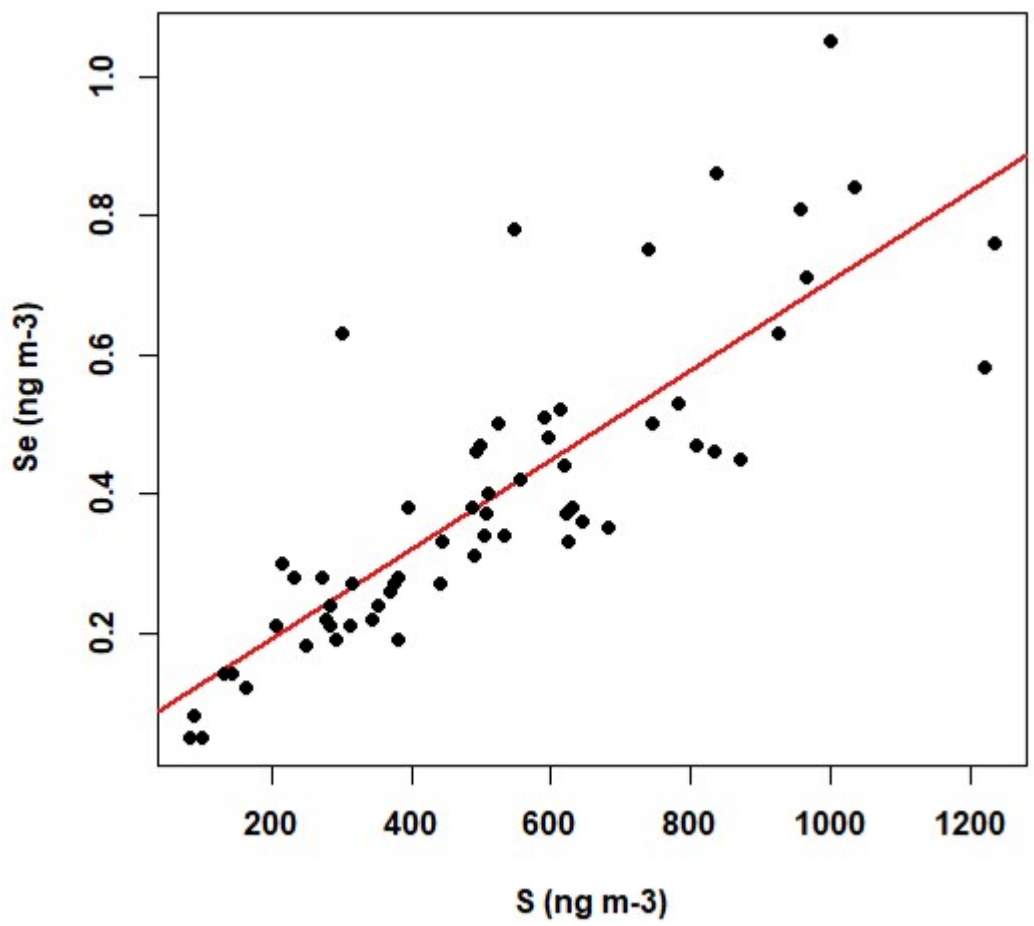

Figure S7. Linear relation between Se and S

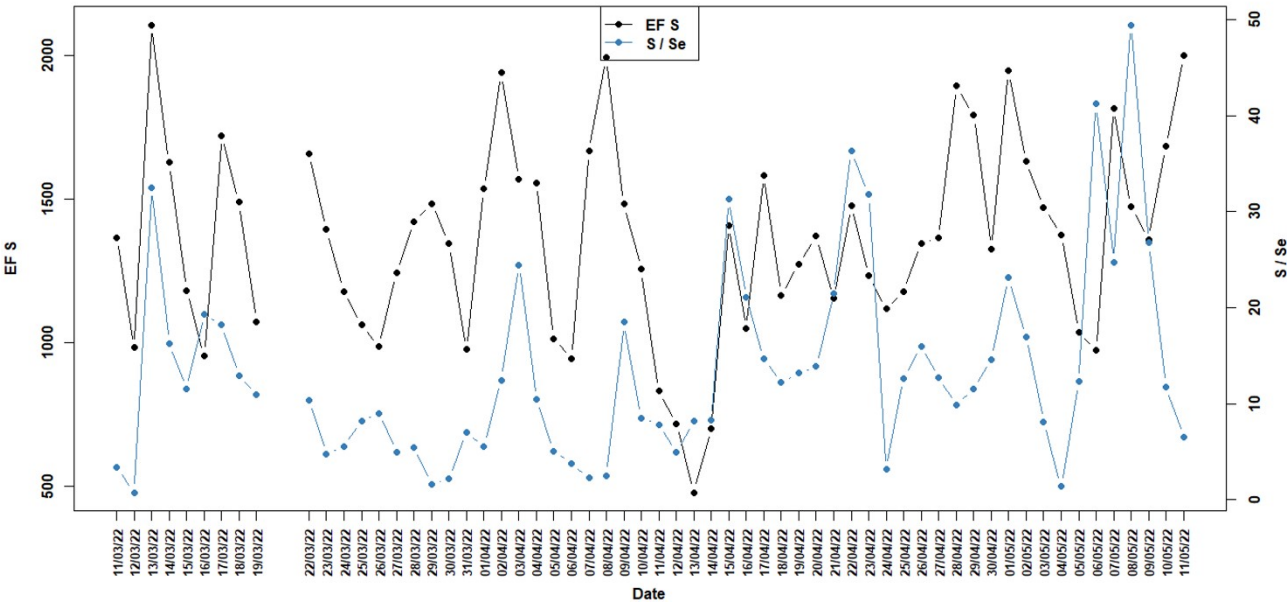

Figure S8. Comparison of the time trends of sulfur EF and the ratio S/Se.
