# Supplementary figures and images for: Trace elements in PM2.5 shed light on Saharan dust incursions over the Munich airshed in spring 2022
Source: Royal Society of Chemistry journal article supplement (doi:10.1039/d4ea00092g), 2024-01-01

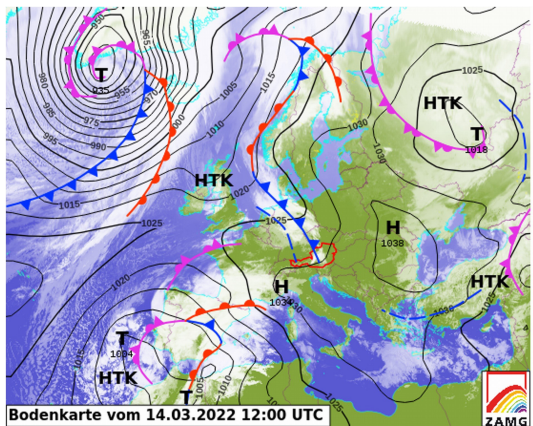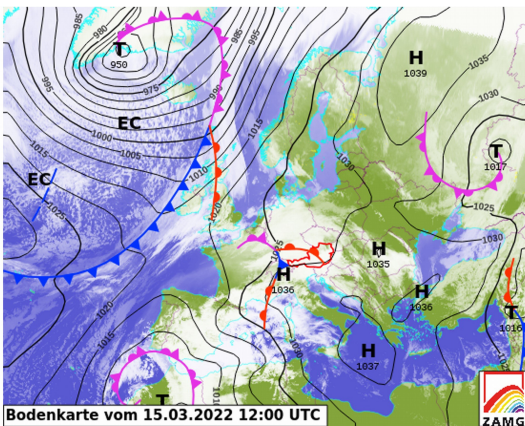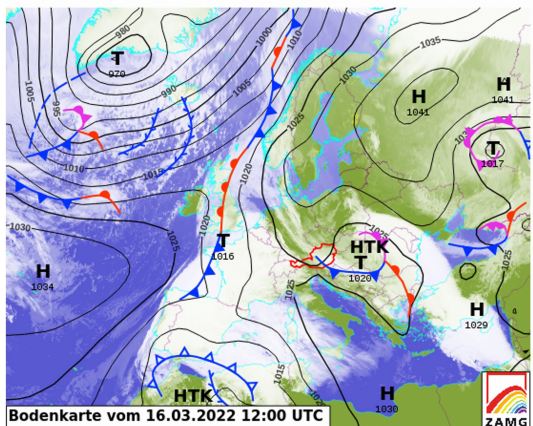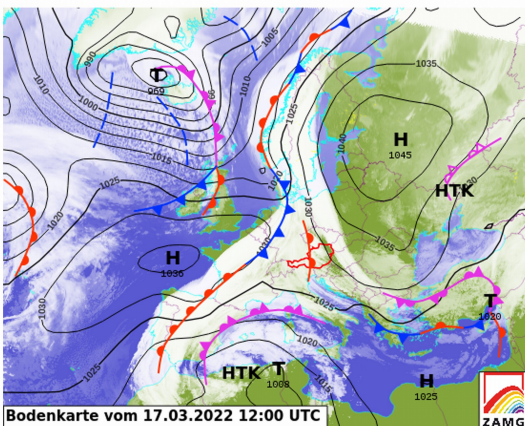

Supplement: d4ea00092g1.pdf [file d4ea00092g1.pdf]

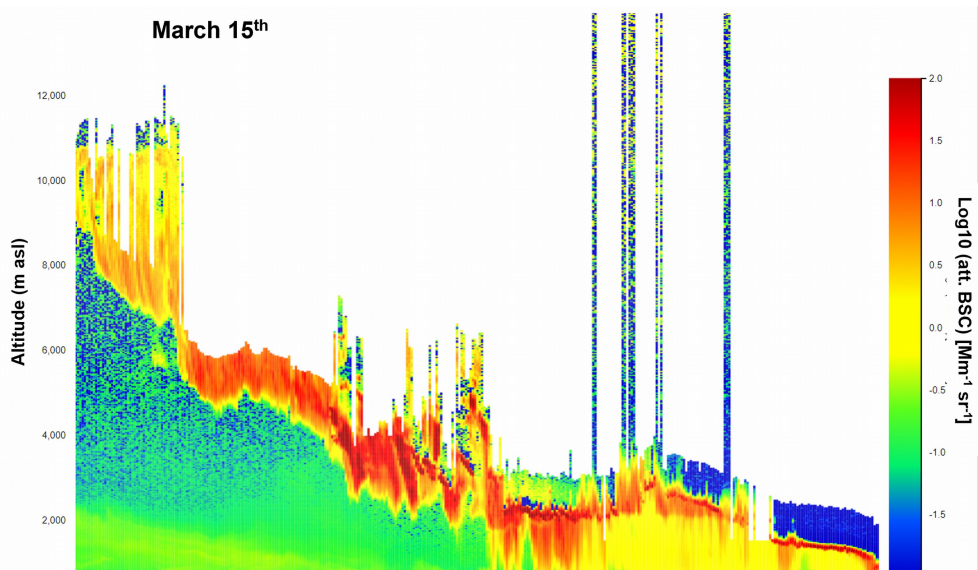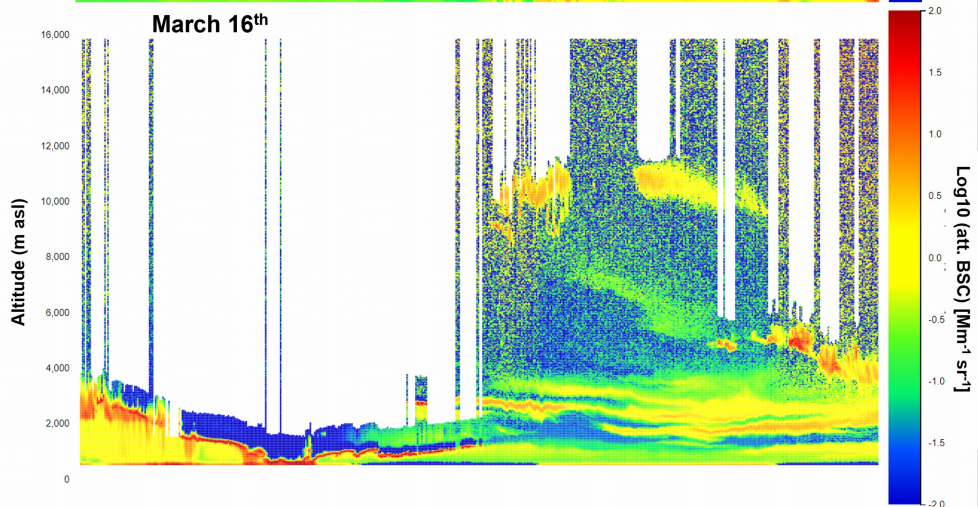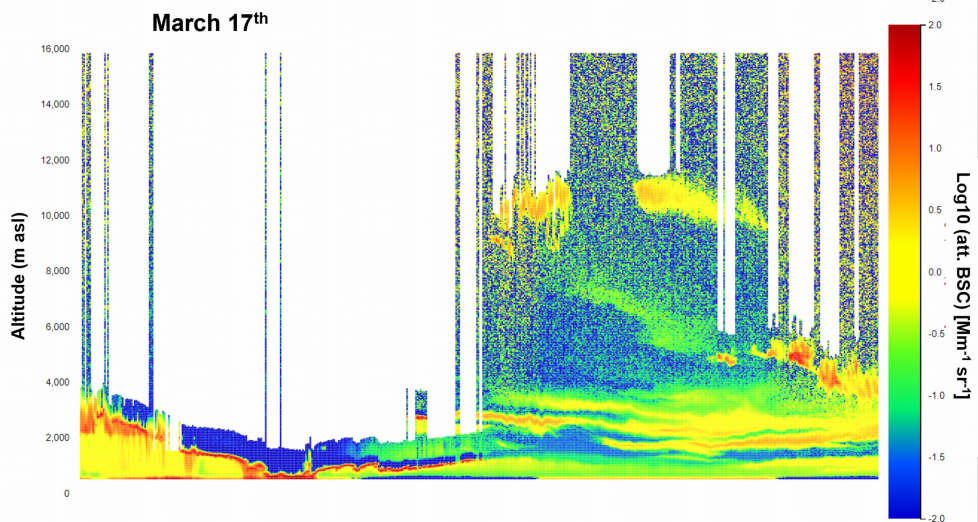

Supplement: d4ea00092g3.pdf [file d4ea00092g3.pdf]

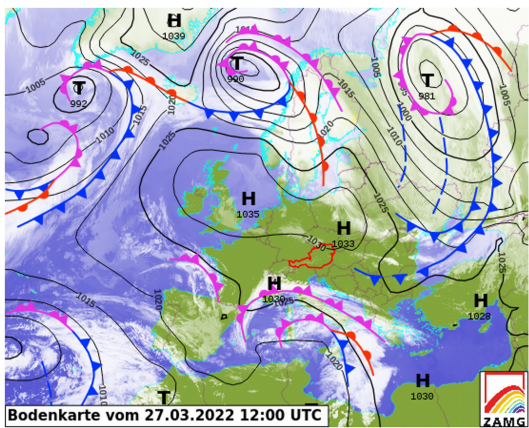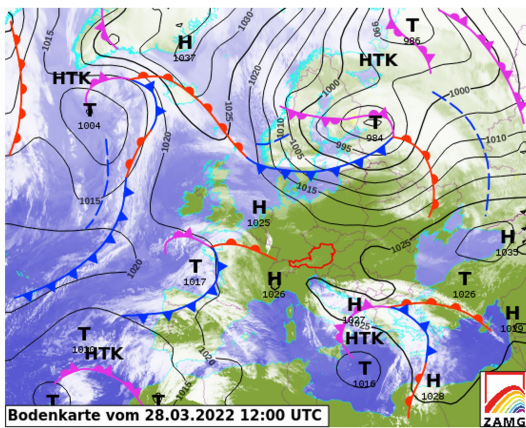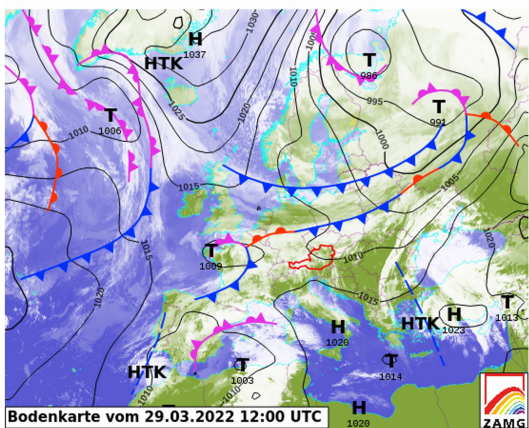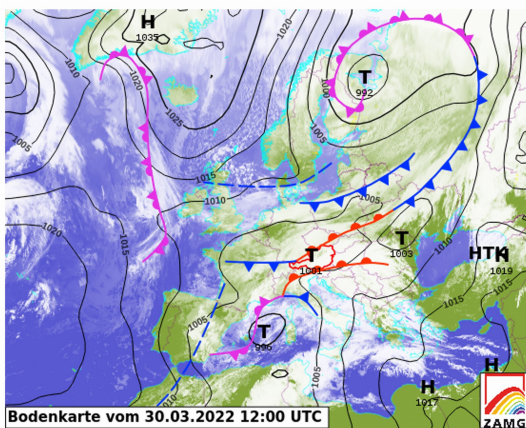

Supplement: d4ea00092g4.pdf [file d4ea00092g4.pdf]

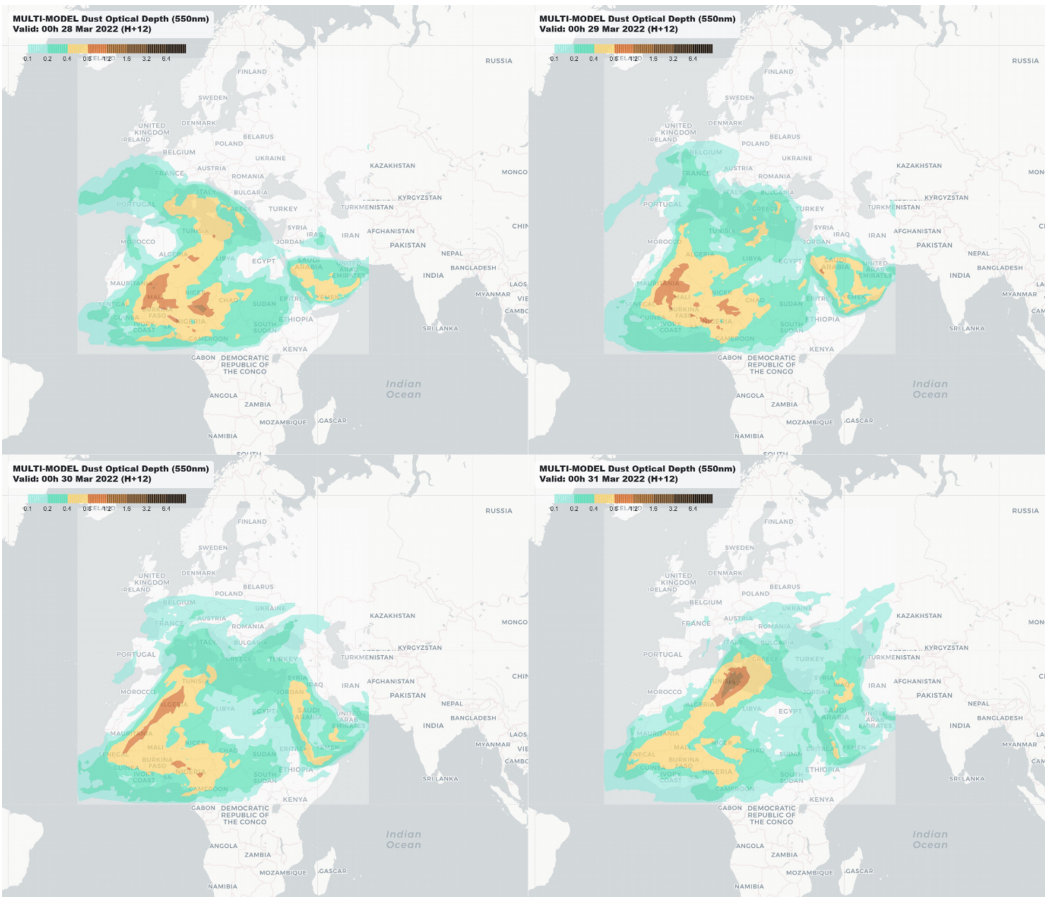

Supplement: d4ea00092g5.pdf [file d4ea00092g5.pdf]

March 30<sup>th</sup>

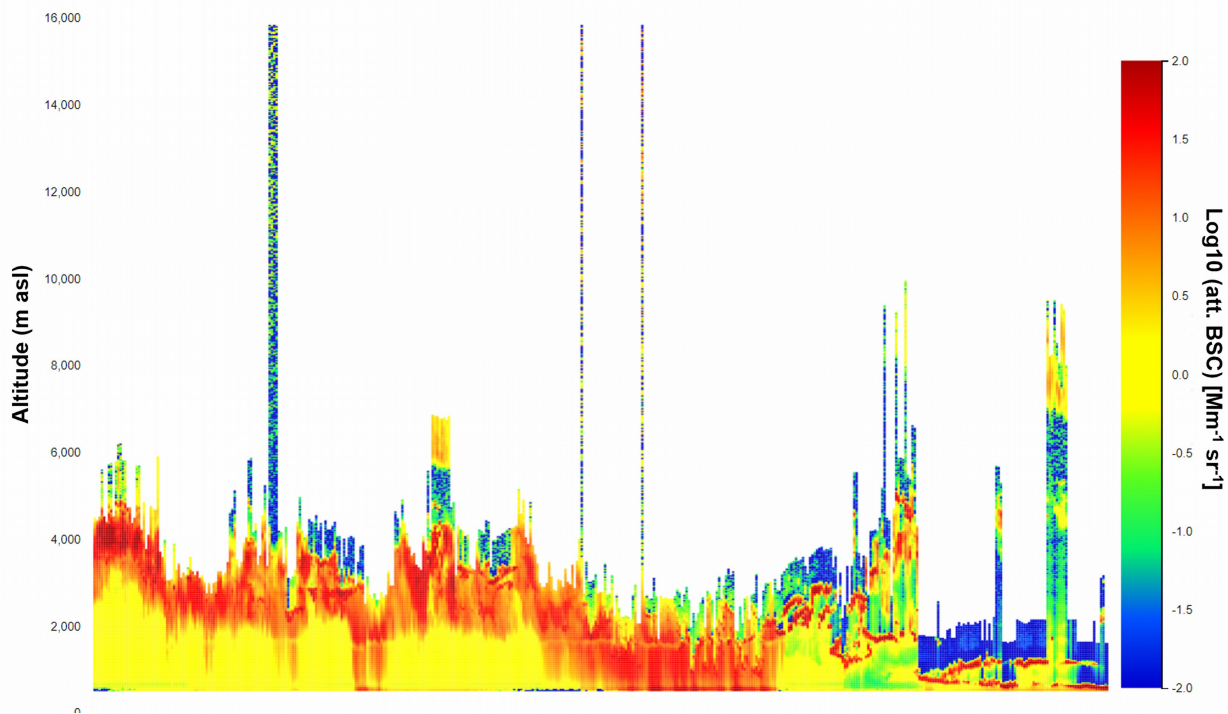

March 31<sup>st</sup>

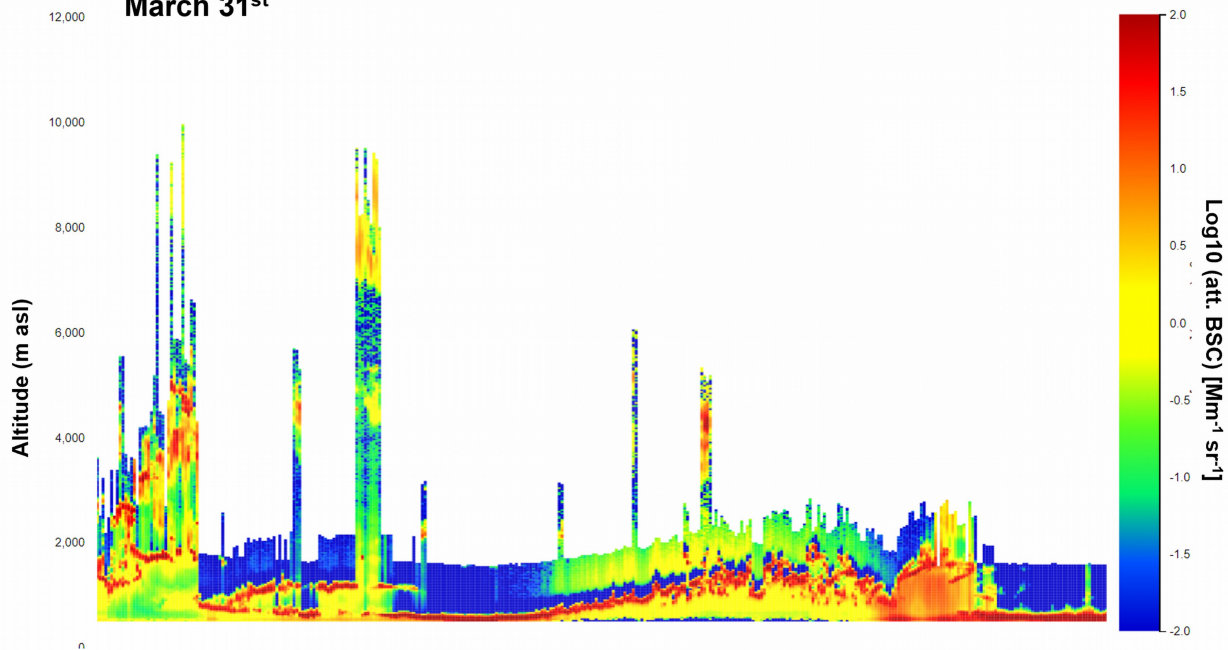

Supplement: d4ea00092g6.pdf [file d4ea00092g6.pdf]

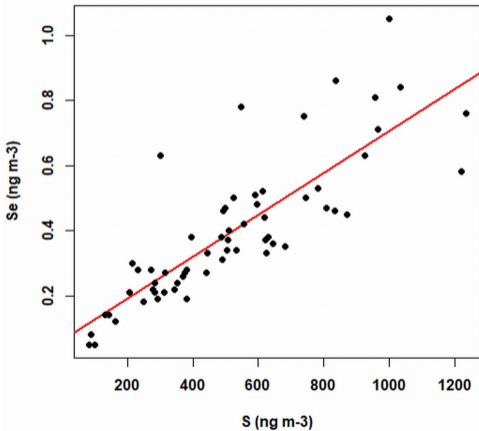

Supplement: d4ea00092g7.pdf [file d4ea00092g7.pdf]

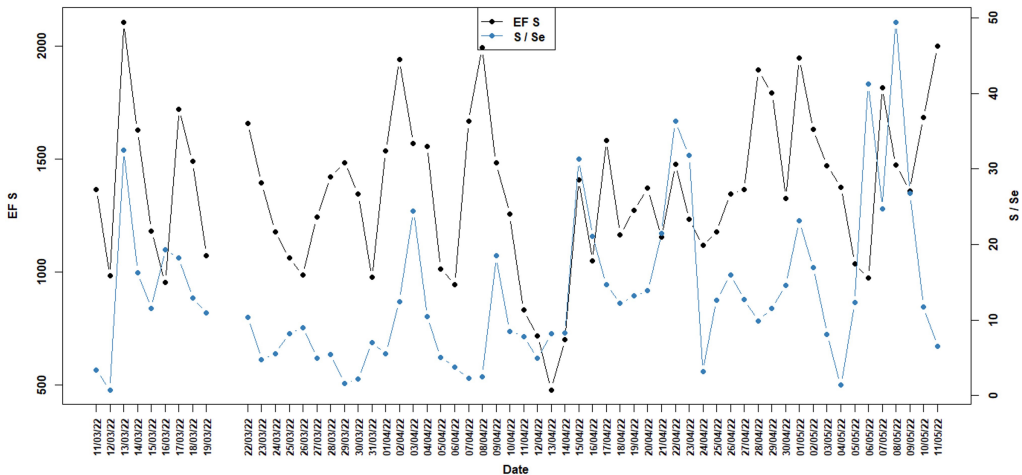

Supplement: d4ea00092g8.pdf [file d4ea00092g8.pdf]
